# Supplementary material
Source: PubMed Central journal article supplement (PMC2970638)

## Suppl. Table S1

Transcript Profile comparison (Bakay et al, *Neuromuscular Disord.* 2002)

|                   | Gene                                 | % mdx/C57                        |
|-------------------|--------------------------------------|----------------------------------|
| DGC or Integrin   | <b>Integrin <math>\beta</math>2</b>  | <b>242.4</b>                     |
|                   | <b>Integrin <math>\alpha</math>7</b> | <b>26.6</b>                      |
|                   | Filamin A                            | 18.5                             |
|                   | Dystroglycan                         | -15.7                            |
|                   | $\gamma$ Sarcoglycan                 | -17                              |
|                   | <b>Dystrophin</b>                    | <b>-72.9</b>                     |
|                   | FA and Cytoskeleton                  | <b><math>\gamma</math> Actin</b> |
| <b>Vinculin</b>   |                                      | <b>35.1</b>                      |
| <b>NMM2A</b>      |                                      | <b>33</b>                        |
| Rhotekin $\alpha$ |                                      | 29                               |
| Paxillin          |                                      | 14.4                             |
| NMM2B             |                                      | 4.8                              |
| SMM2              |                                      | -4.6                             |
| <b>FAK (PTK2)</b> |                                      | <b>-27</b>                       |
| MAPK's            |                                      | <b>MAPK3 (ERK1/2)</b>            |
|                   | MAPK14                               | -15.7                            |
|                   | <b>MAPK12</b>                        | <b>-29.9</b>                     |

| Total protein | C57                                                                                 | <i>mdx</i>                                                                            |
|---------------|-------------------------------------------------------------------------------------|---------------------------------------------------------------------------------------|
| Vinculin      |  |  |
| Tubulin       |  |  |

## Suppl. Fig. S2

Stretch activation of MAPK pathways is generic and sustained, but phospho-Paxillin consistently shows basal levels.

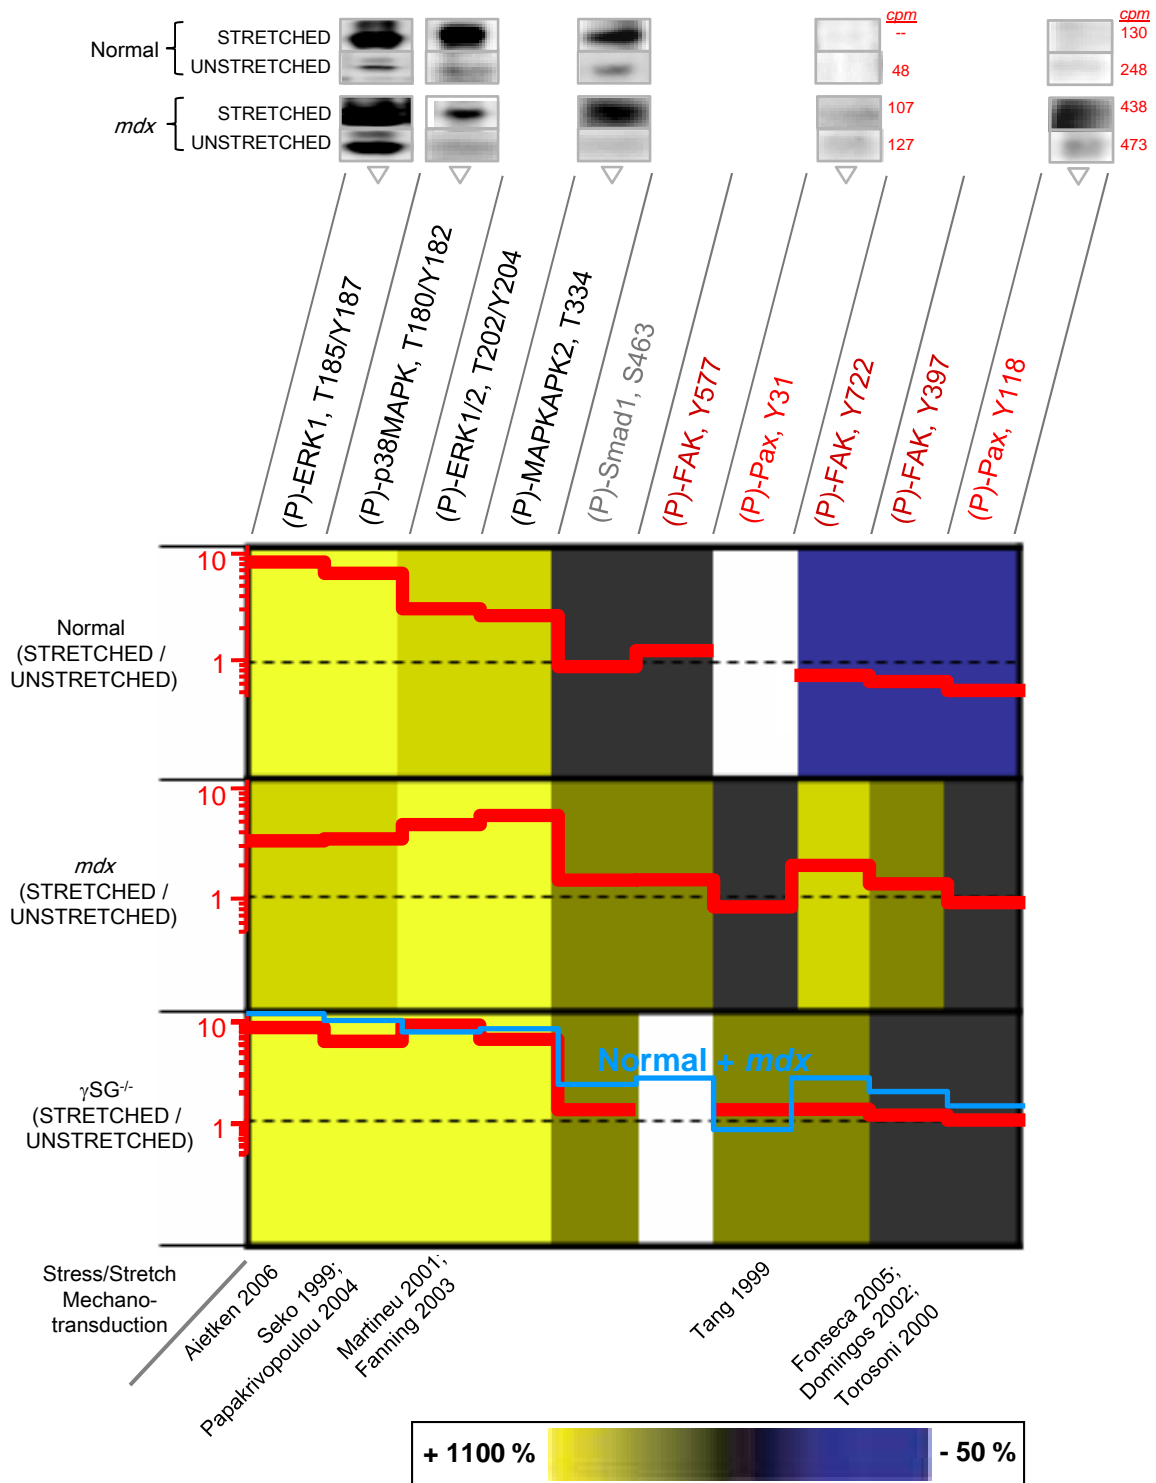

### Suppl. Fig. S3

#### Co-Localization of Paxillin in Myotubes

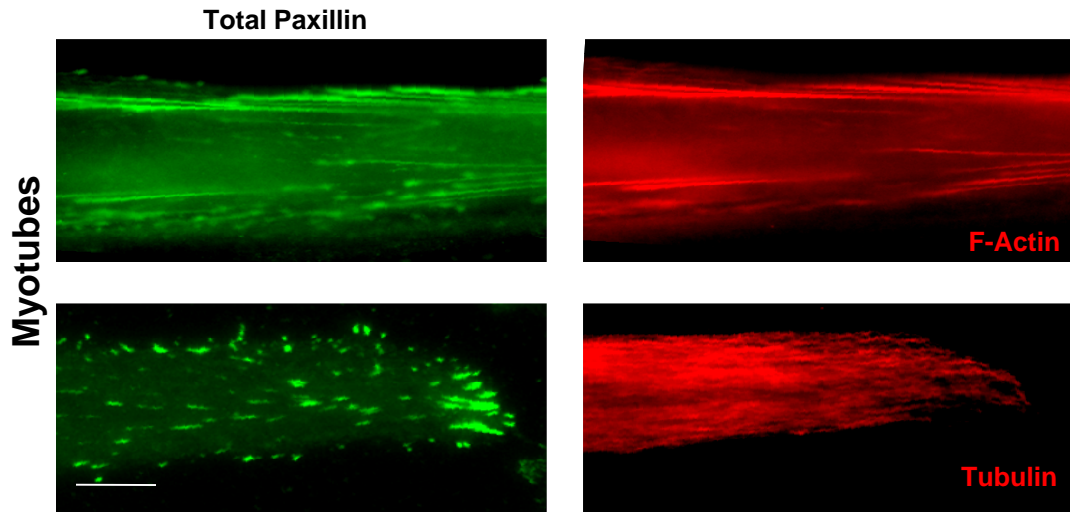

### Suppl. Fig. S4

#### Blebbistatin relaxes tension and decreases (P)-ERK in *ex vivo* Myofibers

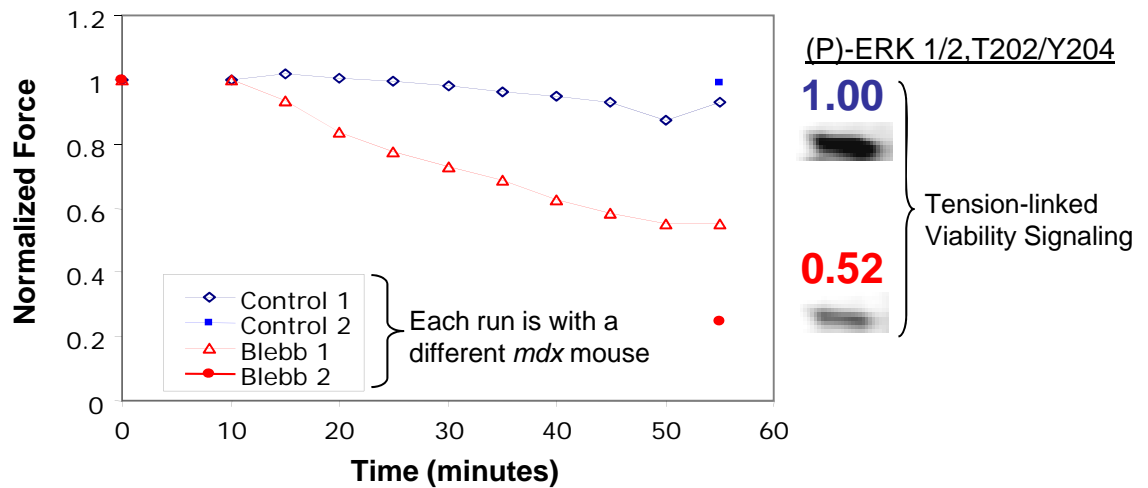

# Suppl. Fig. S5

GFP-Paxillin diffusion in myoblasts based on FRAP.

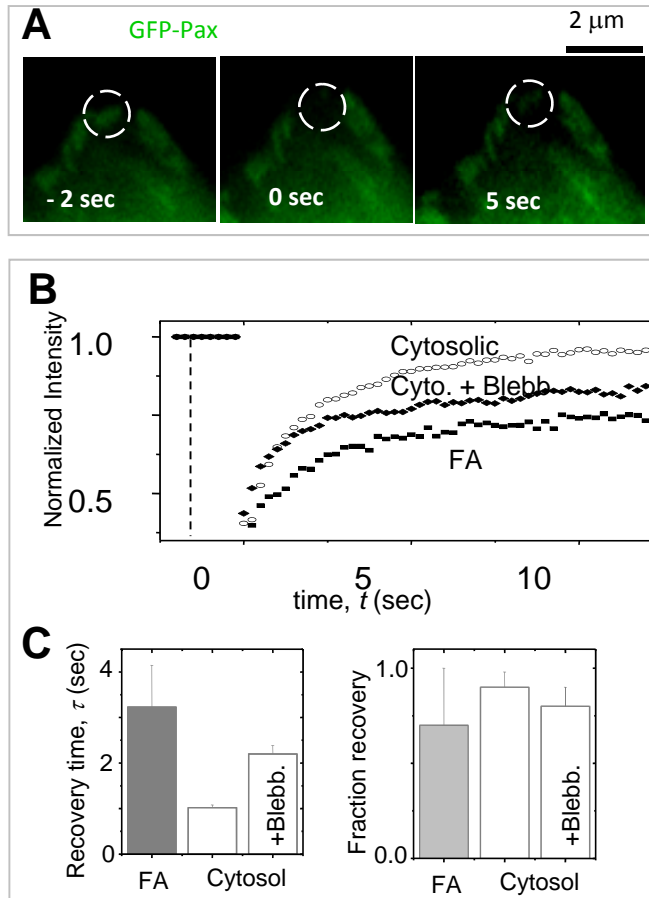

**Suppl. Fig. S6** Pax overexpression does not remodel adhesions or contribute to adhesion strength, consistent with a non-structural role in signaling

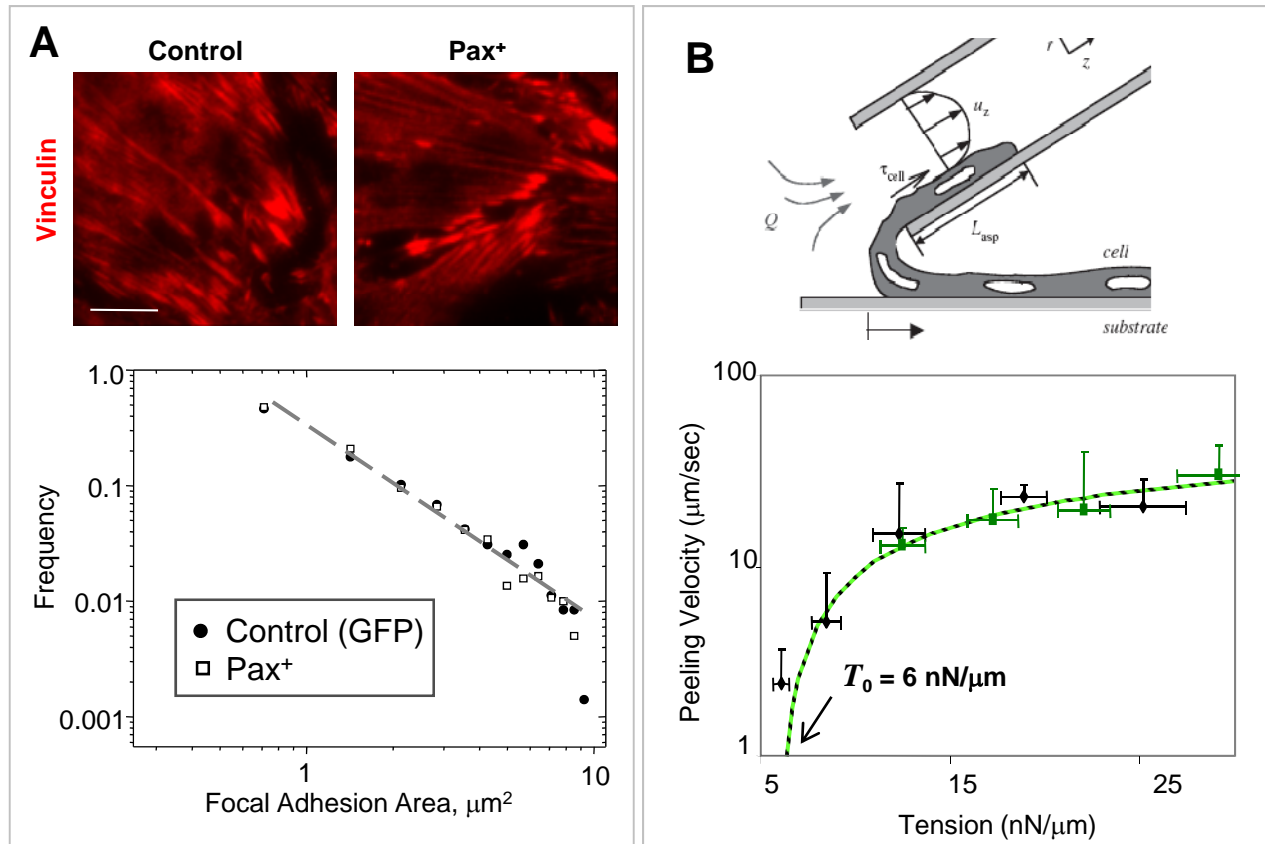

**Suppl. Fig. S7**

Spontaneous relaxation of  $\gamma\text{SG}^{-/-}$  but not mdx myotubes

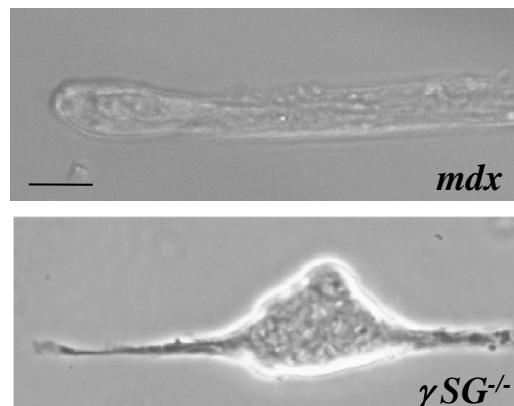

Supplement: NIHMS219609-supplement-01.pdf [file NIHMS219609-supplement-01.pdf]
